# Supplementary material for: Detection and characterization of jagged ends of double-stranded DNA in plasma
Source: PubMed Central journal article supplement — Genome Res. 2020 Aug;30(8):1144–53. doi: 10.1101/gr.261396.120 (PMC7462074; doi:10.1101/gr.261396.120), 2020-08
Supplement: supp_gr.261396.120_Supplemental_Fig_S1.pdf [file supp_gr.261396.120_Supplemental_Fig_S1.pdf]

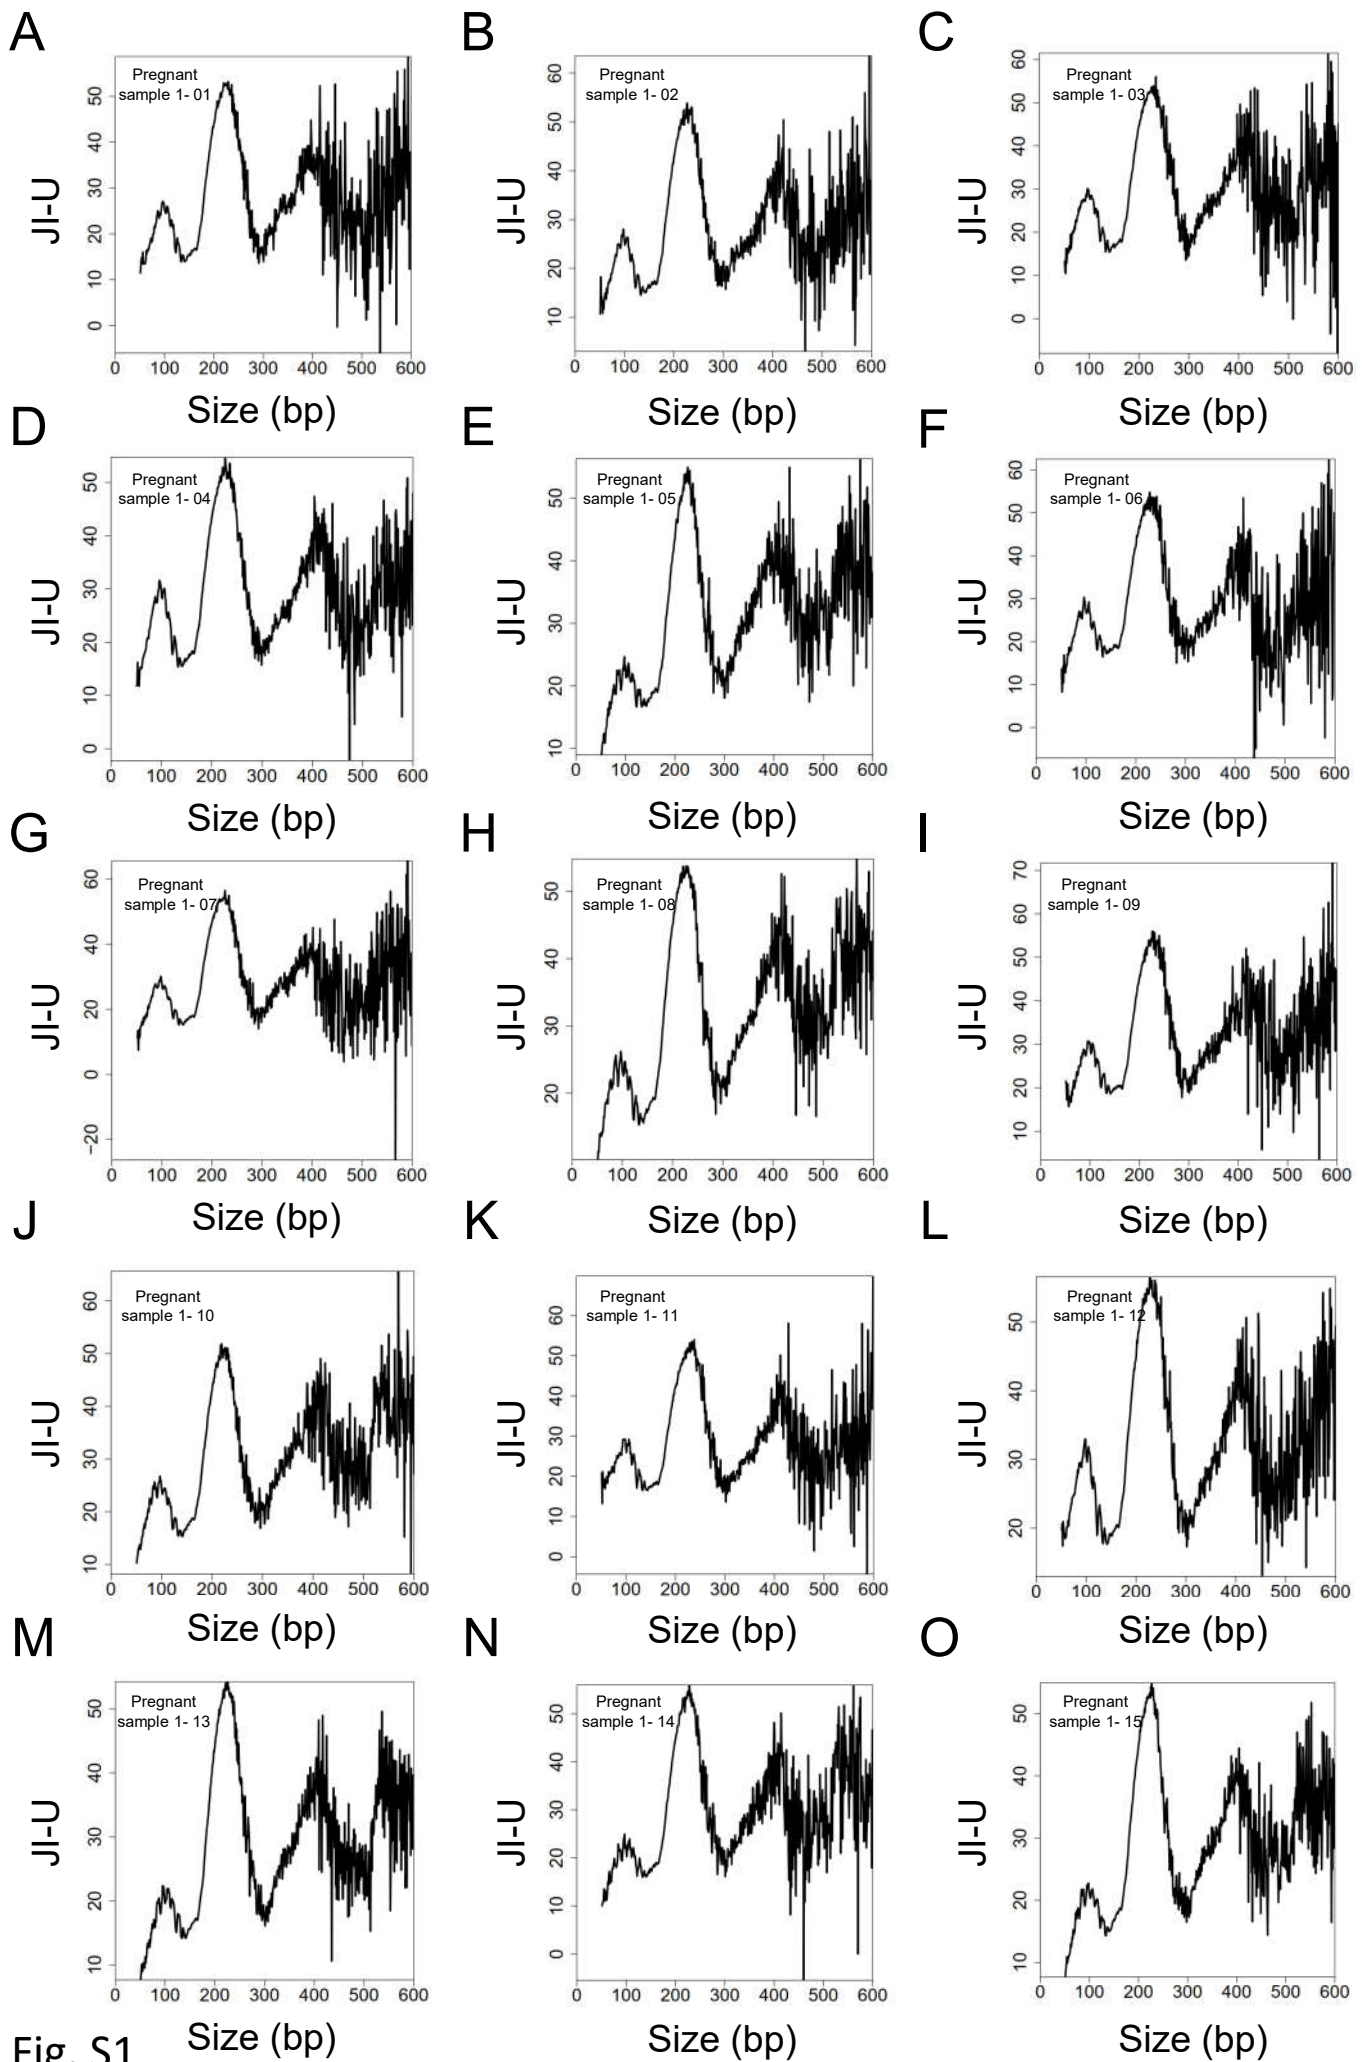

Fig. S1

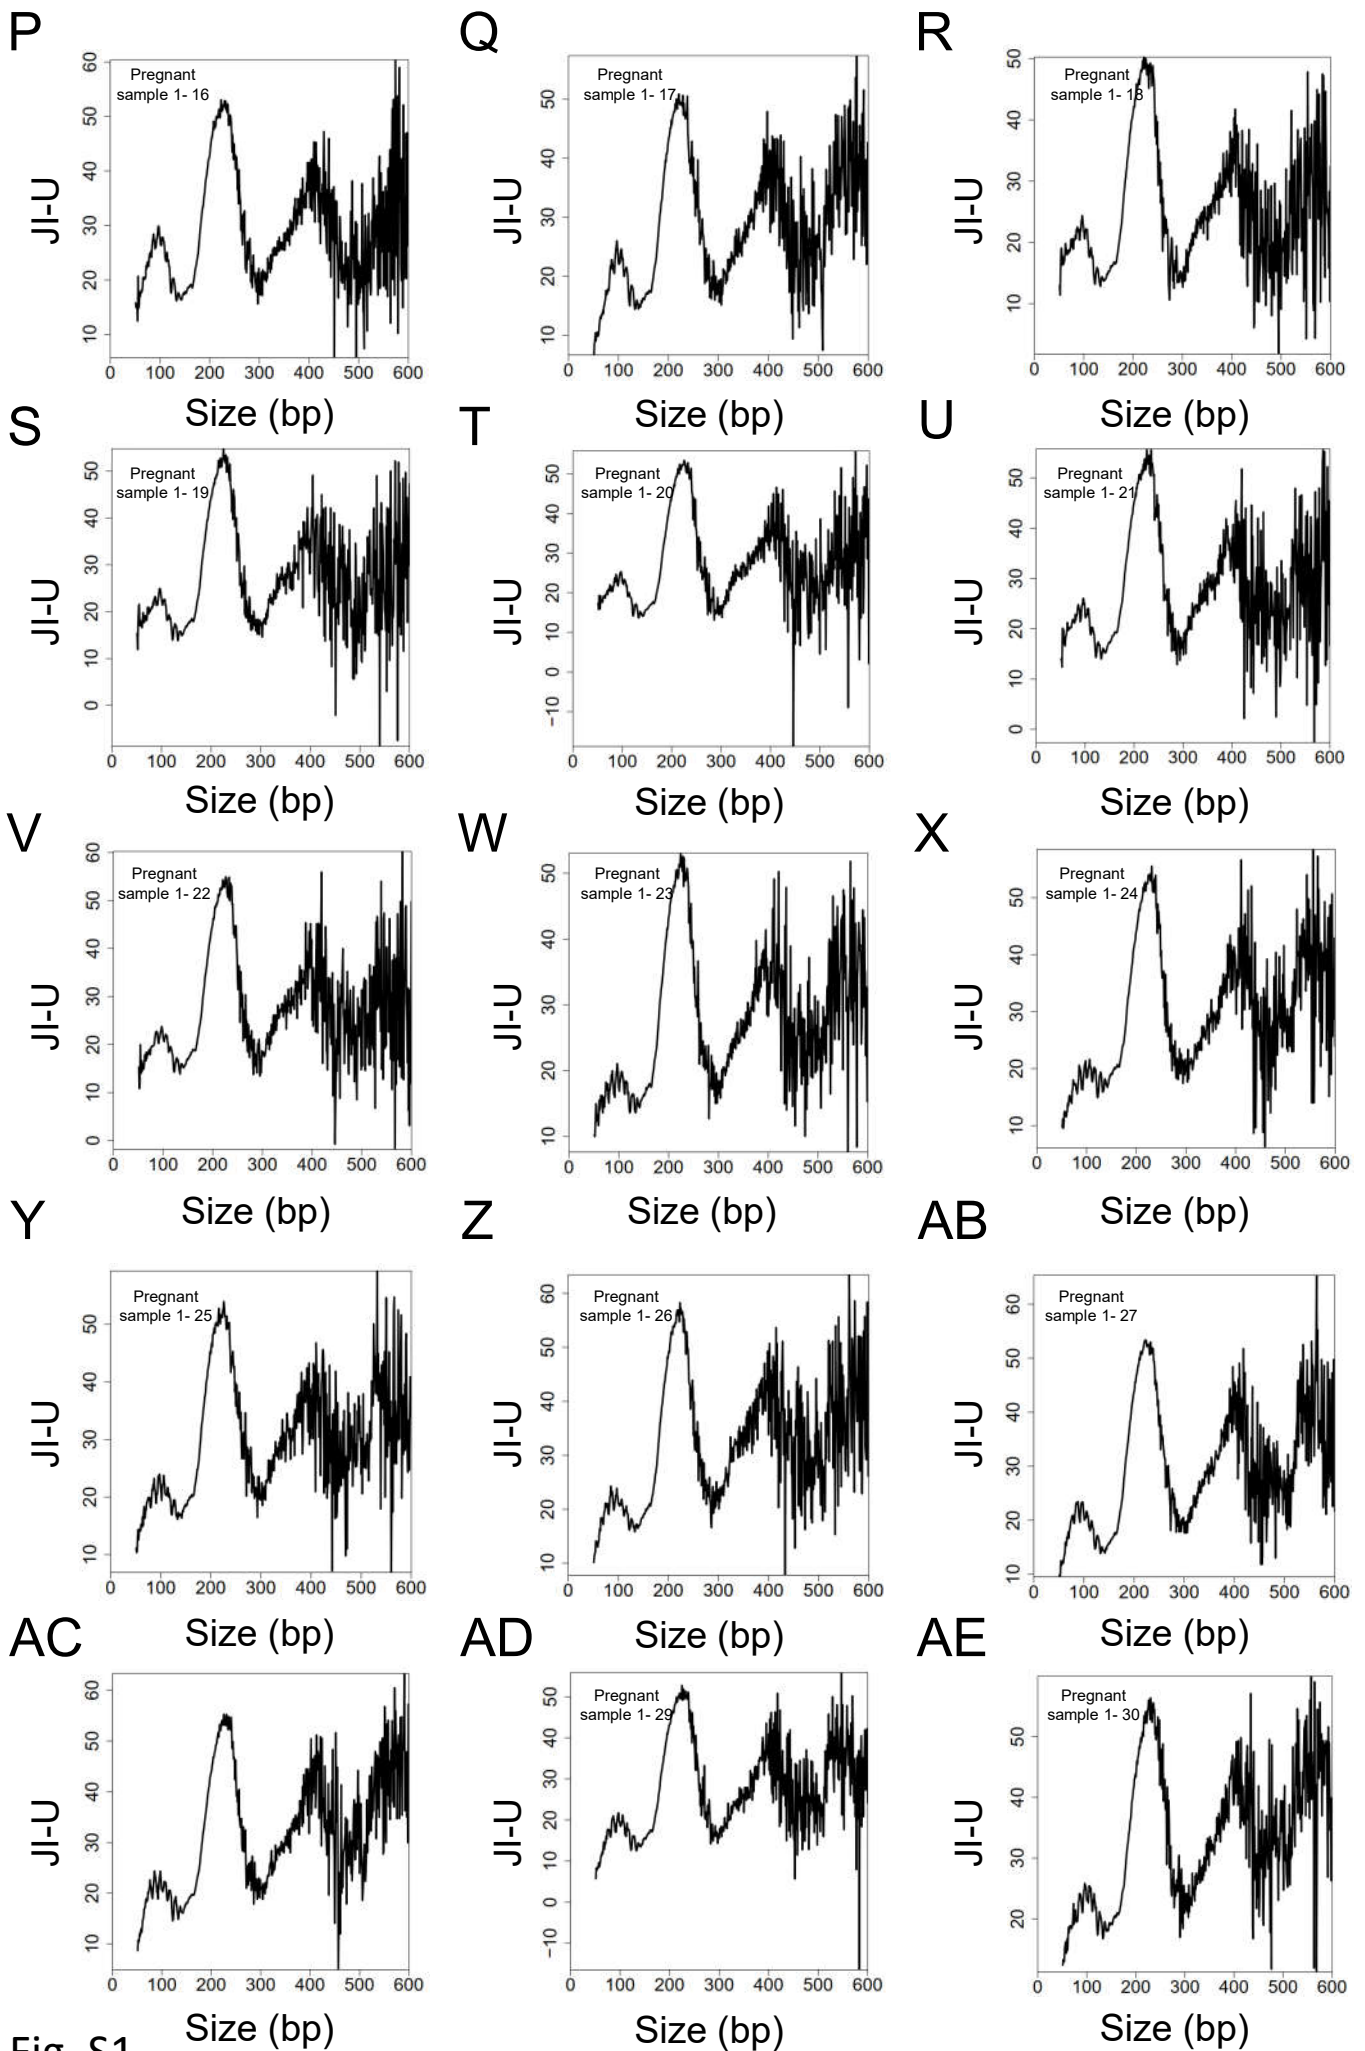

Fig. S1

Fig. S1. The JI-U values across different sizes of plasma DNA using the approach based on unmethylated signals at CG sites. JI-U represents the jagged index deduced from unmethylated signals from CpG sites.
