# Supplementary material for: Detection and characterization of jagged ends of double-stranded DNA in plasma
Source: PubMed Central journal article supplement — Genome Res. 2020 Aug;30(8):1144–53. doi: 10.1101/gr.261396.120 (PMC7462074; doi:10.1101/gr.261396.120), 2020-08
Supplement: supp_gr.261396.120_Supplemental_Fig_S2.pdf [file supp_gr.261396.120_Supplemental_Fig_S2.pdf]

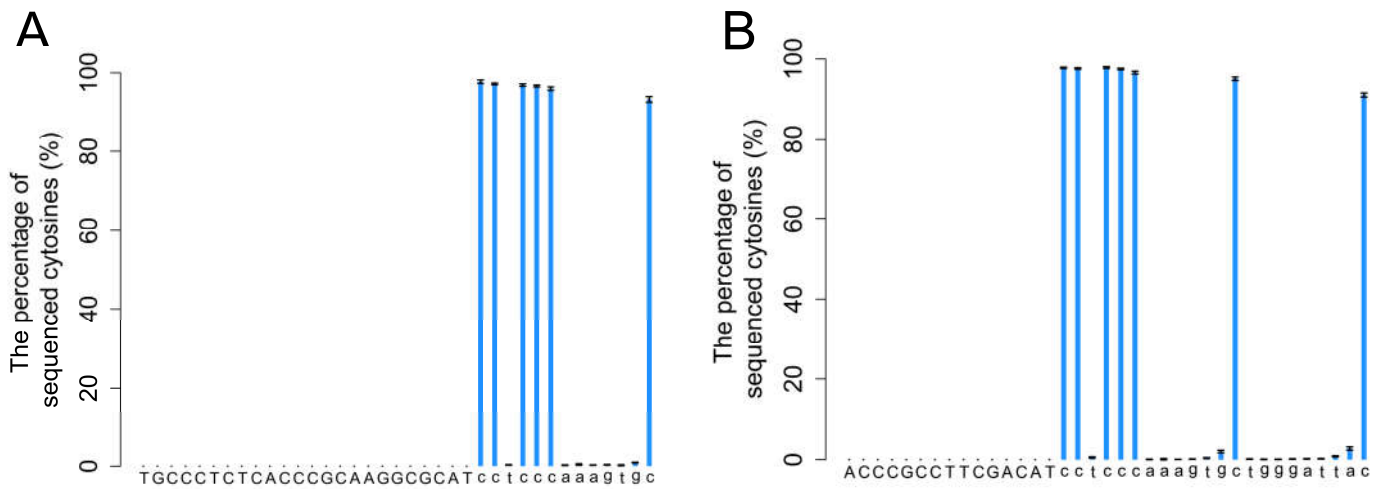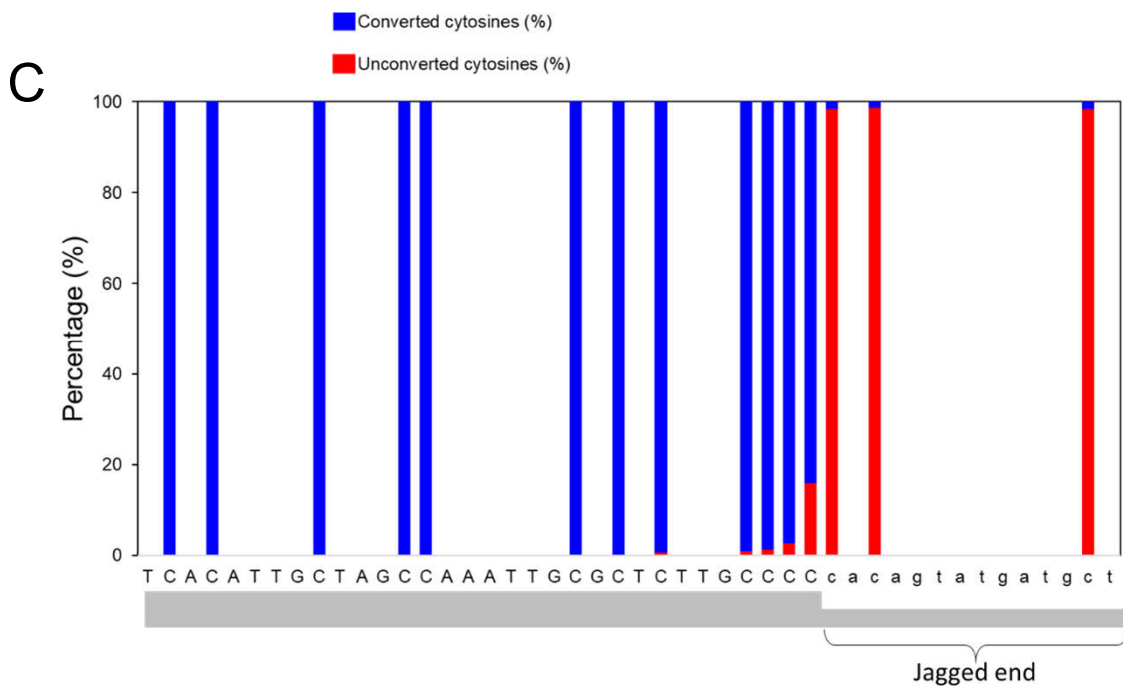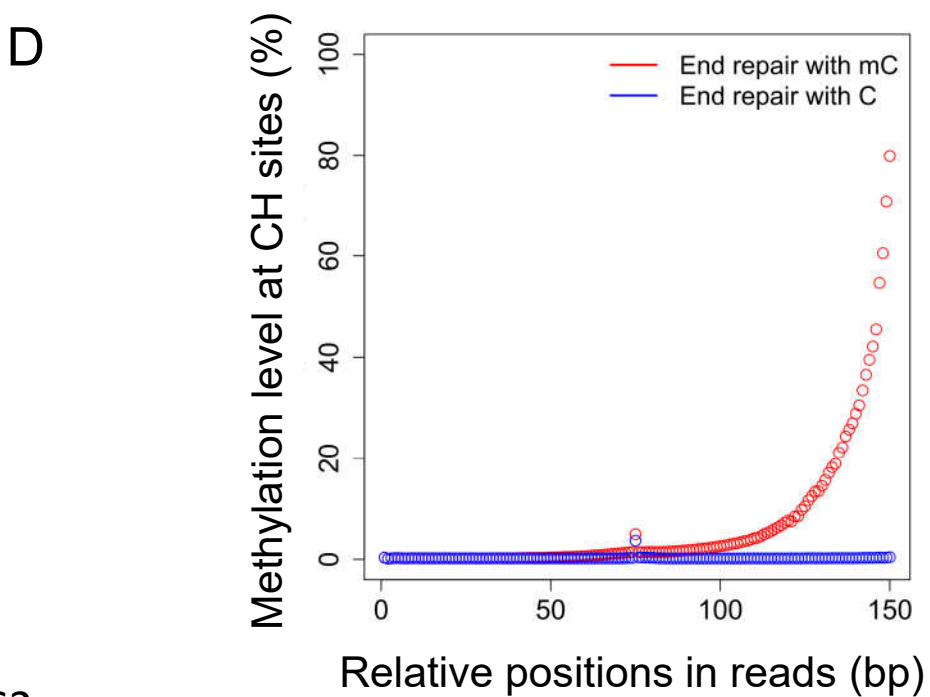

Fig. S2

Fig. S2. Evaluation of the incorporation of 5mC in the jagged ends during the end repair step. (A) The synthetic jagged end with 13 nt in size. The lowercases represent the bases in the jagged end that will involve the filling of mC. The uppercases represent the bases in the double-stranded region that will not involve filling of mC. (B) The synthetic jagged end with 22 nt in size. (C) Validation of the CC-tag strategy using a synthetic oligonucleotide carrying jagged end. The capital letters indicate the bases in double-stranded DNA. The lowercase letters indicate the bases in single-stranded DNA of a jagged end. (D) Methylation levels at CH sites for DNA samples end-repaired with unmethylated Cs (blue dots) and methylated C (red dots), respectively.
