# Supplementary material for: Detection and characterization of jagged ends of double-stranded DNA in plasma
Source: PubMed Central journal article supplement — Genome Res. 2020 Aug;30(8):1144–53. doi: 10.1101/gr.261396.120 (PMC7462074; doi:10.1101/gr.261396.120), 2020-08
Supplement: supp_gr.261396.120_Supplemental_Fig_S3.pdf [file supp_gr.261396.120_Supplemental_Fig_S3.pdf]

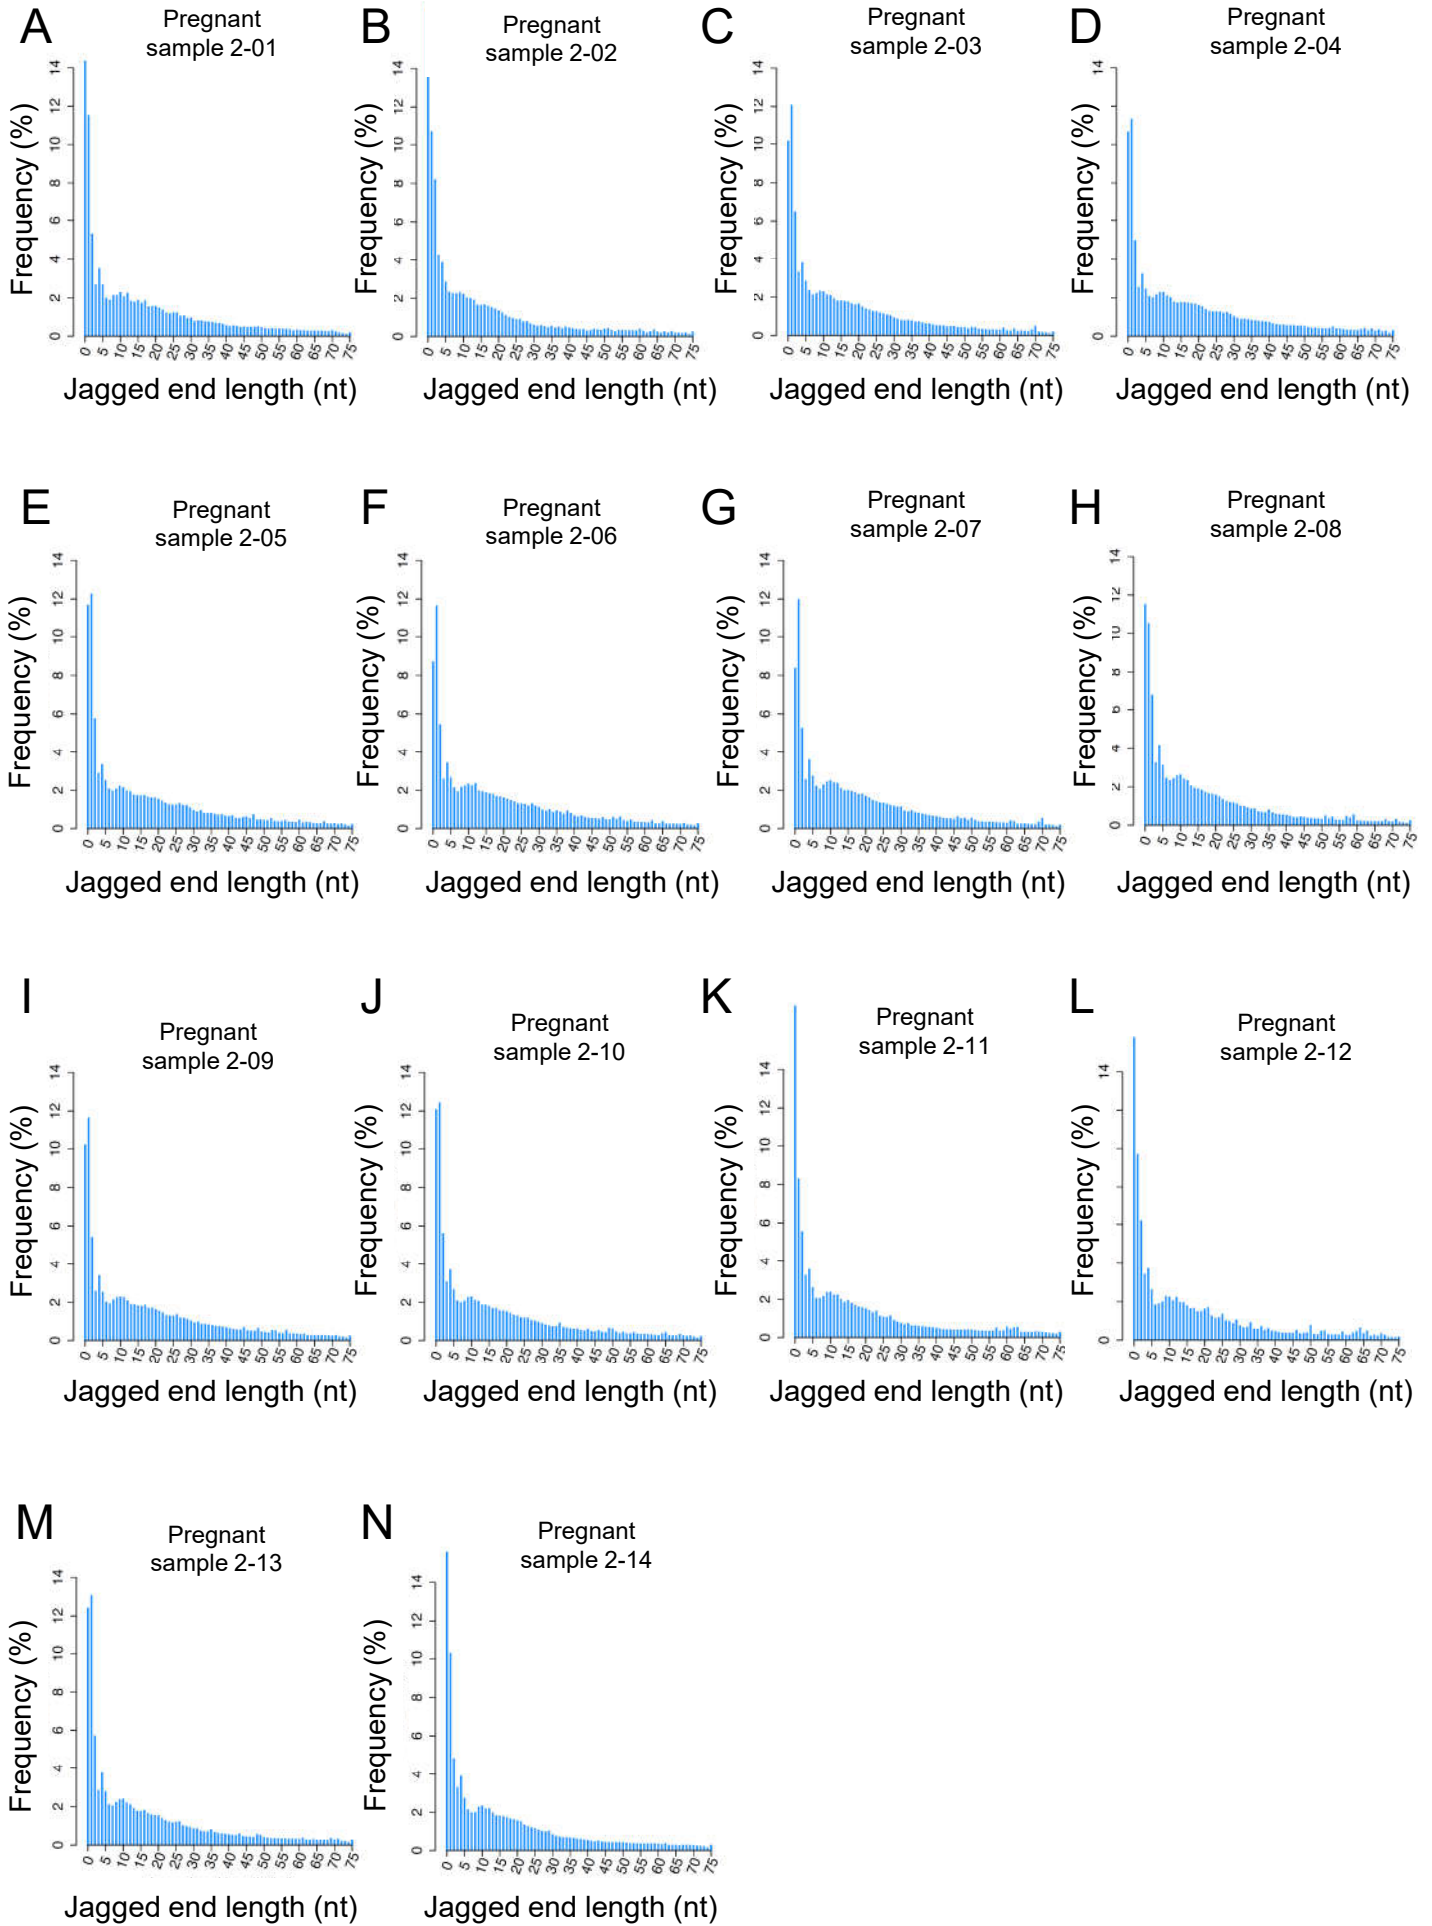

Fig. S3

Fig. S3. Jagged end length distributions deduced by methylation at CH sites across different samples.
