# Supplementary material for: Detection and characterization of jagged ends of double-stranded DNA in plasma
Source: PubMed Central journal article supplement — Genome Res. 2020 Aug;30(8):1144–53. doi: 10.1101/gr.261396.120 (PMC7462074; doi:10.1101/gr.261396.120), 2020-08
Supplement: supp_gr.261396.120_Supplemental_Fig_S4.pdf [file supp_gr.261396.120_Supplemental_Fig_S4.pdf]

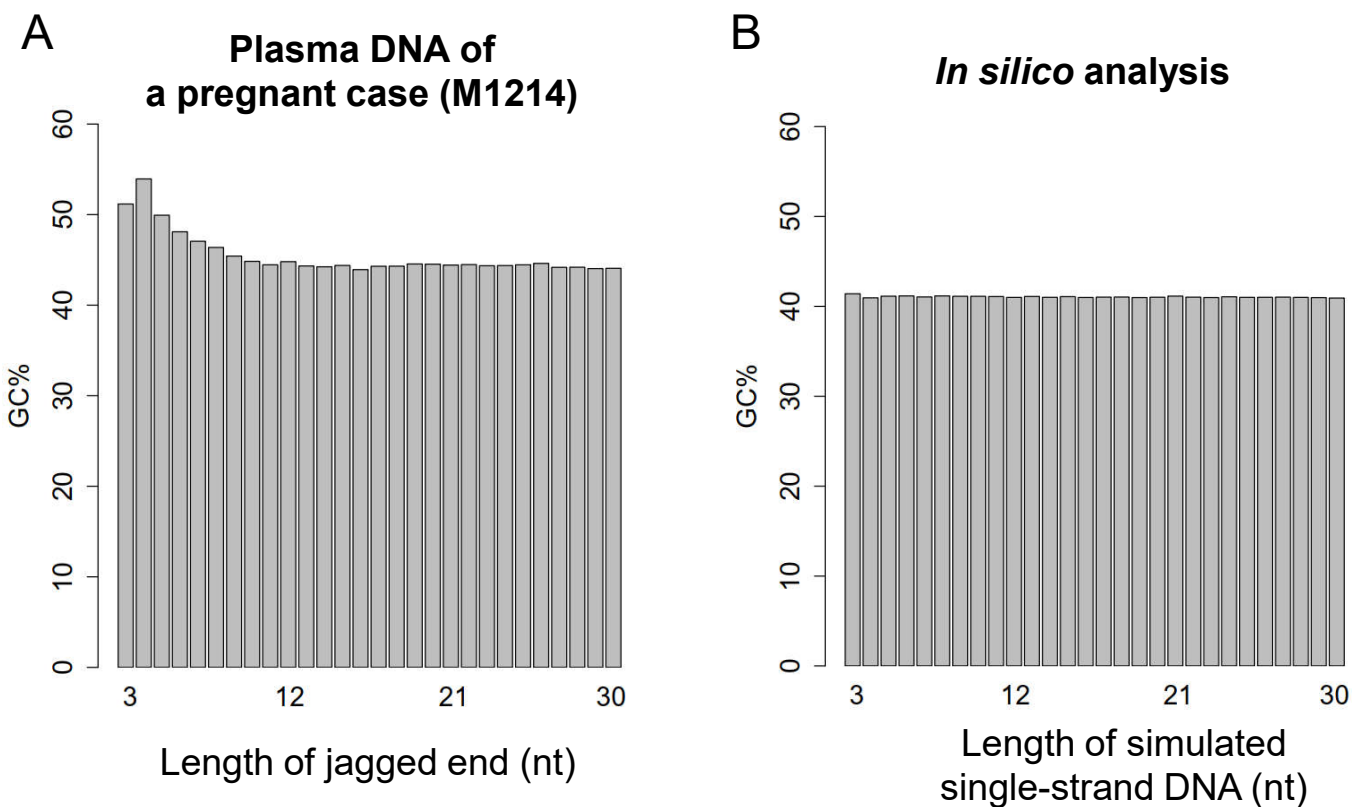

Fig. S4. Relationship between CG% and jagged end length. (A) GC% versus jagged end length for a plasma DNA sample. (B) GC% versus single-stranded DNA stretches in silico generated from the human reference genome (Hg19).
