# Supplementary material for: Detection and characterization of jagged ends of double-stranded DNA in plasma
Source: PubMed Central journal article supplement — Genome Res. 2020 Aug;30(8):1144–53. doi: 10.1101/gr.261396.120 (PMC7462074; doi:10.1101/gr.261396.120), 2020-08
Supplement: supp_gr.261396.120_Supplemental_Fig_S5.pdf [file supp_gr.261396.120_Supplemental_Fig_S5.pdf]

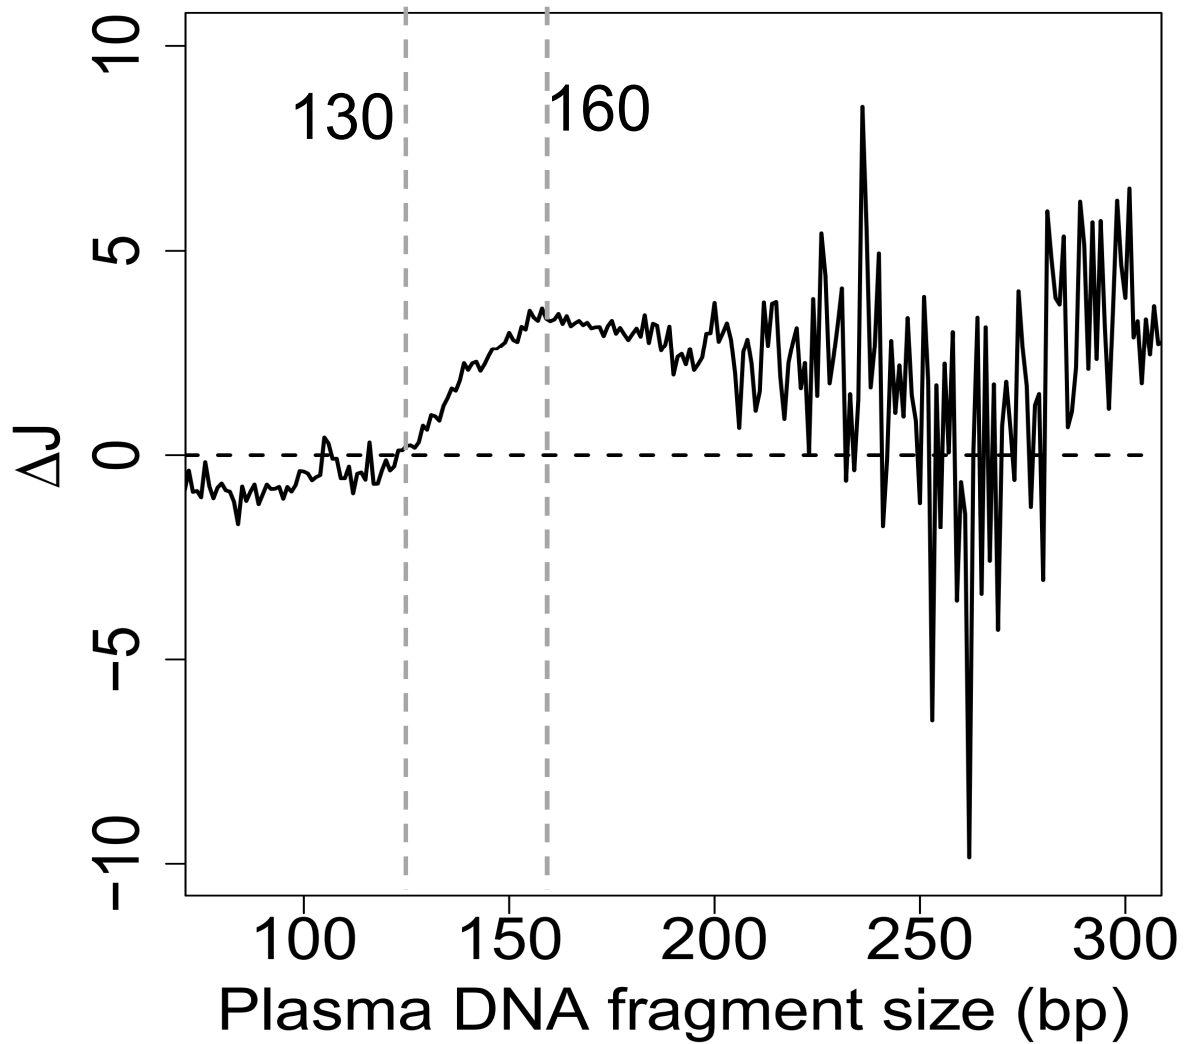

Fig. S5. The difference in JI-M ( $\Delta J$ ) between the pooled shared (mainly of maternal origin) and fetal-specific DNA molecules against different sizes of plasma DNA. JI-M represents the jagged index deduced from methylated signals from CH sites.
