# Supplementary material for: Detection and characterization of jagged ends of double-stranded DNA in plasma
Source: PubMed Central journal article supplement — Genome Res. 2020 Aug;30(8):1144–53. doi: 10.1101/gr.261396.120 (PMC7462074; doi:10.1101/gr.261396.120), 2020-08
Supplement: supp_gr.261396.120_Supplemental_Fig_S6.pdf [file supp_gr.261396.120_Supplemental_Fig_S6.pdf]

### Jagged ends between fetal and maternal DNA across different size ranges

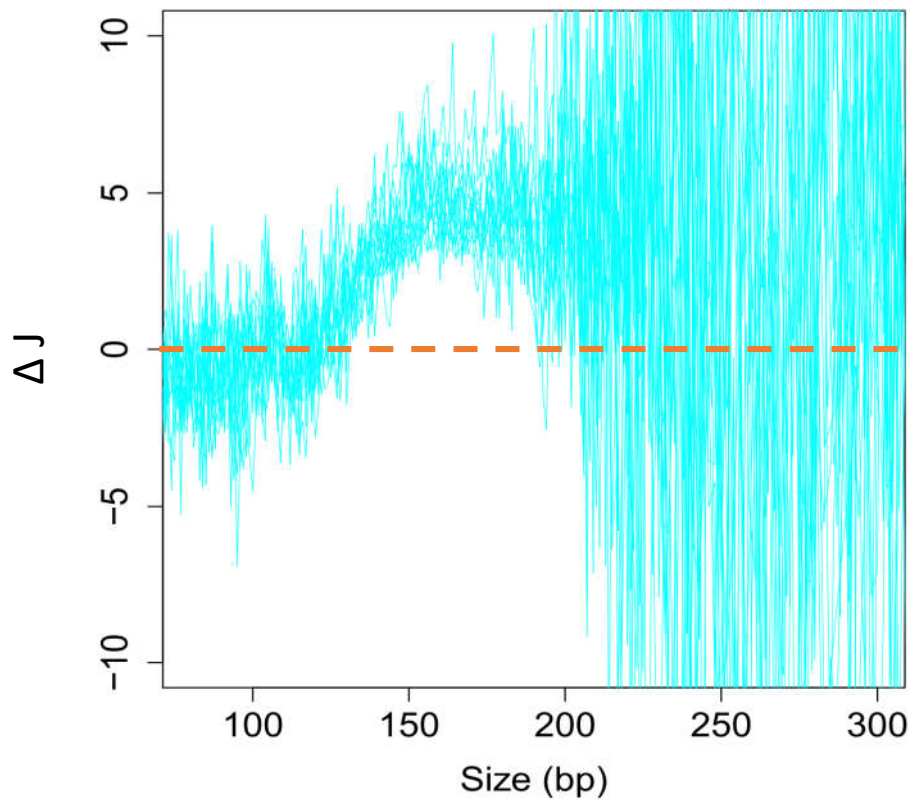

Fig. S6. The difference in JI-M between the shared and fetal-specific DNA in individual plasma DNA samples of pregnant women. JI-M represents the jagged index deduced from methylated signals from CH sites.
