# Supplementary material for: Detection and characterization of jagged ends of double-stranded DNA in plasma
Source: PubMed Central journal article supplement — Genome Res. 2020 Aug;30(8):1144–53. doi: 10.1101/gr.261396.120 (PMC7462074; doi:10.1101/gr.261396.120), 2020-08
Supplement: supp_gr.261396.120_Supplemental_Fig_S8.pdf [file supp_gr.261396.120_Supplemental_Fig_S8.pdf]

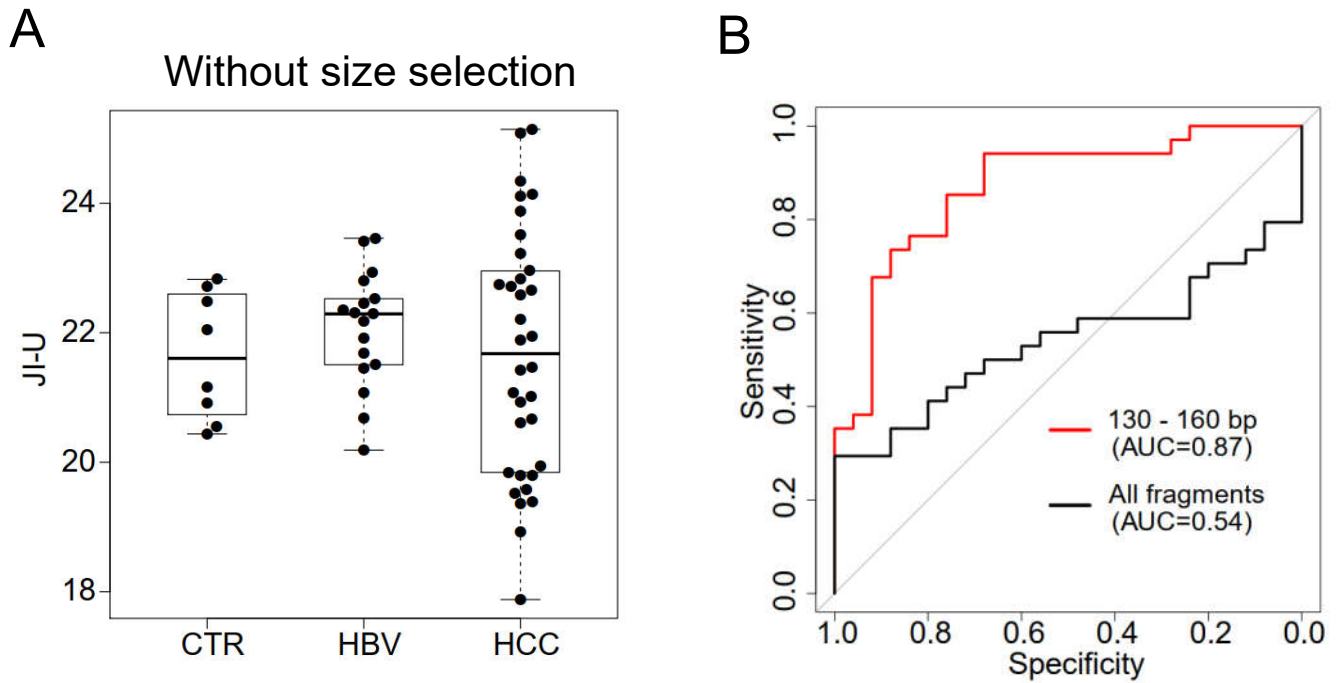

Fig. S8. Jaggedness indices across healthy control subjects (CTR), patients infected with chronic hepatitis B virus (HBV) and patients with hepatocellular carcinoma (HCC). (A) Jaggedness index deduced using all fragments without size selection. (B) ROC curves for jaggedness index between fragments within a range of 130 to 160 bp and without size selection. The y-axis indicates the jaggedness index utilizing the filling of unmethylated cytosine (JI-U).
