# Supplementary material for: Detection and characterization of jagged ends of double-stranded DNA in plasma
Source: PubMed Central journal article supplement — Genome Res. 2020 Aug;30(8):1144–53. doi: 10.1101/gr.261396.120 (PMC7462074; doi:10.1101/gr.261396.120), 2020-08
Supplement: supp_gr.261396.120_Supplemental_Fig_S9.pdf [file supp_gr.261396.120_Supplemental_Fig_S9.pdf]

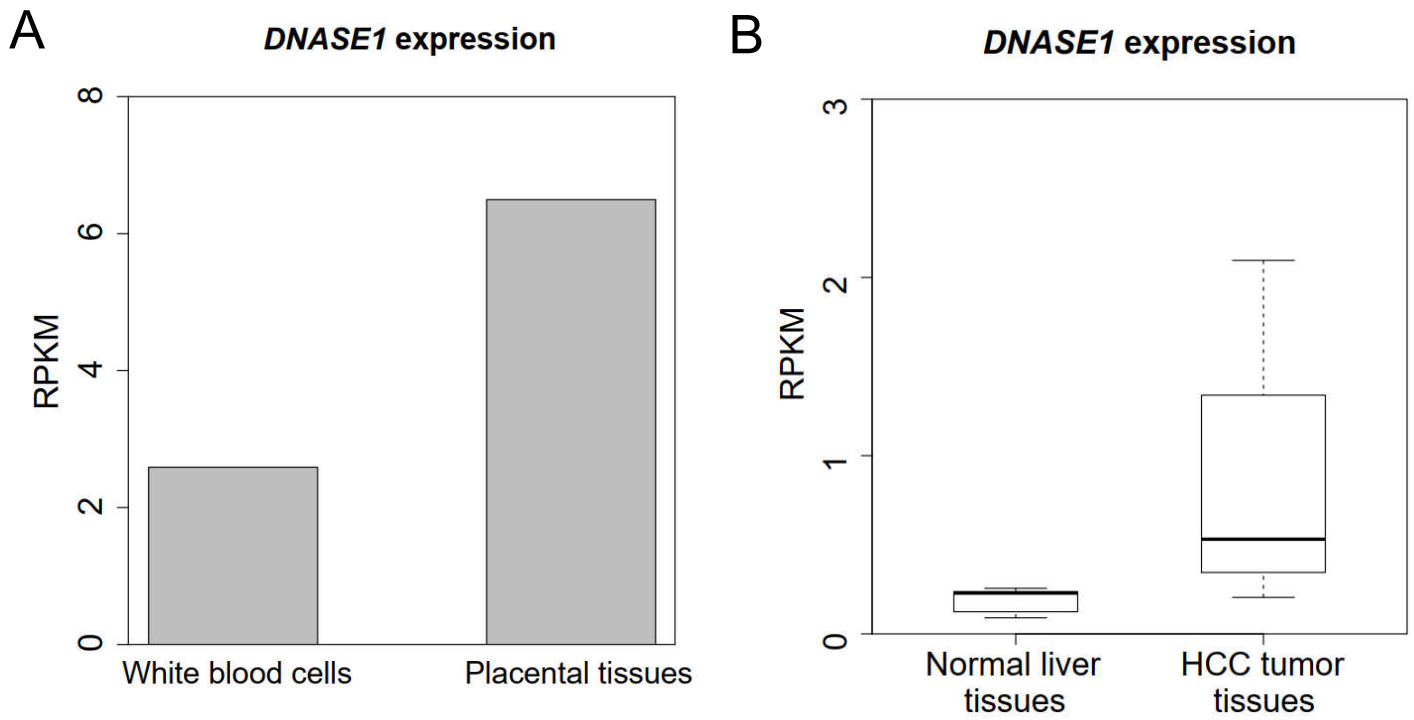

Fig. S9. Gene expression of DNASE1. (A) Placental tissues versus white blood cells. (B) HCC tumor tissues versus matched normal liver tissues.
