# Supplementary material for: Detection and characterization of jagged ends of double-stranded DNA in plasma
Source: PubMed Central journal article supplement — Genome Res. 2020 Aug;30(8):1144–53. doi: 10.1101/gr.261396.120 (PMC7462074; doi:10.1101/gr.261396.120), 2020-08
Supplement: supp_gr.261396.120_Supplemental_Table_S1.pdf [file supp_gr.261396.120_Supplemental_Table_S1.pdf]

| Tissues / organs | Overall methylation levels by whole genome bisulfite sequencing (%) |      |
|------------------|---------------------------------------------------------------------|------|
|                  | CG                                                                  | CH   |
| Liver            | 75.50                                                               | 0.40 |
| Lung             | 80.94                                                               | 0.40 |
| Esophagus        | 76.92                                                               | 0.45 |
| Heart            | 76.96                                                               | 0.54 |
| Pancreas         | 73.91                                                               | 0.47 |
| Colon            | 77.63                                                               | 0.53 |
| Small intestines | 74.59                                                               | 0.39 |
| Adipose          | 77.76                                                               | 0.47 |
| Adrenal glands   | 74.28                                                               | 0.49 |
| Brain            | 75.51                                                               | 1.42 |
| T cells          | 70.37                                                               | 0.50 |
| B cells          | 72.55                                                               | 0.62 |
| Neutrophils      | 78.93                                                               | 0.19 |

Table S1. Genome-wide methylation levels at CG and CH sites across different tissues.
