# Supplementary material for: Detection and characterization of jagged ends of double-stranded DNA in plasma
Source: PubMed Central journal article supplement — Genome Res. 2020 Aug;30(8):1144–53. doi: 10.1101/gr.261396.120 (PMC7462074; doi:10.1101/gr.261396.120), 2020-08
Supplement: supp_gr.261396.120_Supplemental_Table_S2.pdf [file supp_gr.261396.120_Supplemental_Table_S2.pdf]

| No. of informative "C" in jagged ends | End-repair methods | Percentage of fragments carrying informative "C" |
|---------------------------------------|--------------------|--------------------------------------------------|
| 1                                     | C                  | 8.4                                              |
|                                       | mC                 | 59.8                                             |
| 2                                     | C                  | 0.9                                              |
|                                       | mC                 | 33.7                                             |
| 3                                     | C                  | 0.16                                             |
|                                       | mC                 | 20.5                                             |

Table S2. The number of molecules carrying informative cytosines which would be used for inferring the presence of jagged ends for two approaches in this study.
