# Supplementary material for: Detection and characterization of jagged ends of double-stranded DNA in plasma
Source: PubMed Central journal article supplement — Genome Res. 2020 Aug;30(8):1144–53. doi: 10.1101/gr.261396.120 (PMC7462074; doi:10.1101/gr.261396.120), 2020-08
Supplement: supp_gr.261396.120_Supplemental_Table_S3.pdf [file supp_gr.261396.120_Supplemental_Table_S3.pdf]

| Sample names | Largest dimension of tumor (cm) | Histology                                          | Age | Sex | Etiology    |
|--------------|---------------------------------|----------------------------------------------------|-----|-----|-------------|
| TBR2366      | 11                              | Moderately-differentiated hepatocellular carcinoma | 78  | M   | Hepatitis B |
| TBR 2499     | 8                               | Moderately-differentiated hepatocellular carcinoma | 48  | M   | Hepatitis B |
| TBR 2660     | 4                               | Moderately-differentiated hepatocellular carcinoma | 64  | M   | Hepatitis B |

Table S3. Demographic and clinical information for the HCC samples.
