# Supplementary figures and images for: Detection and characterization of jagged ends of double-stranded DNA in plasma
Source: HighWire-hosted journal article supplement (doi:10.1101/gr.261396.120), 2020-08-01

demo

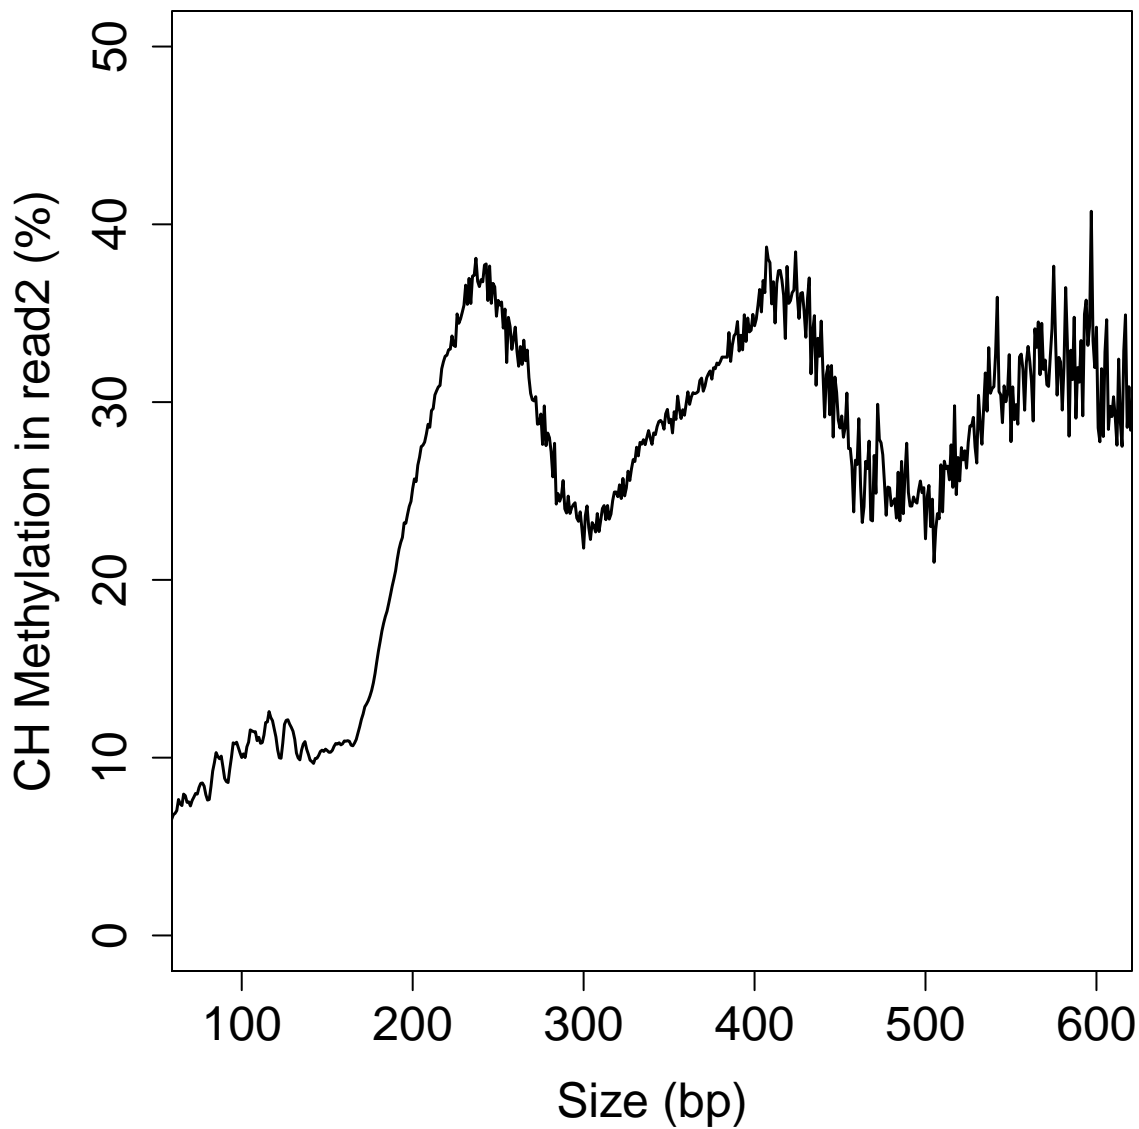

demo

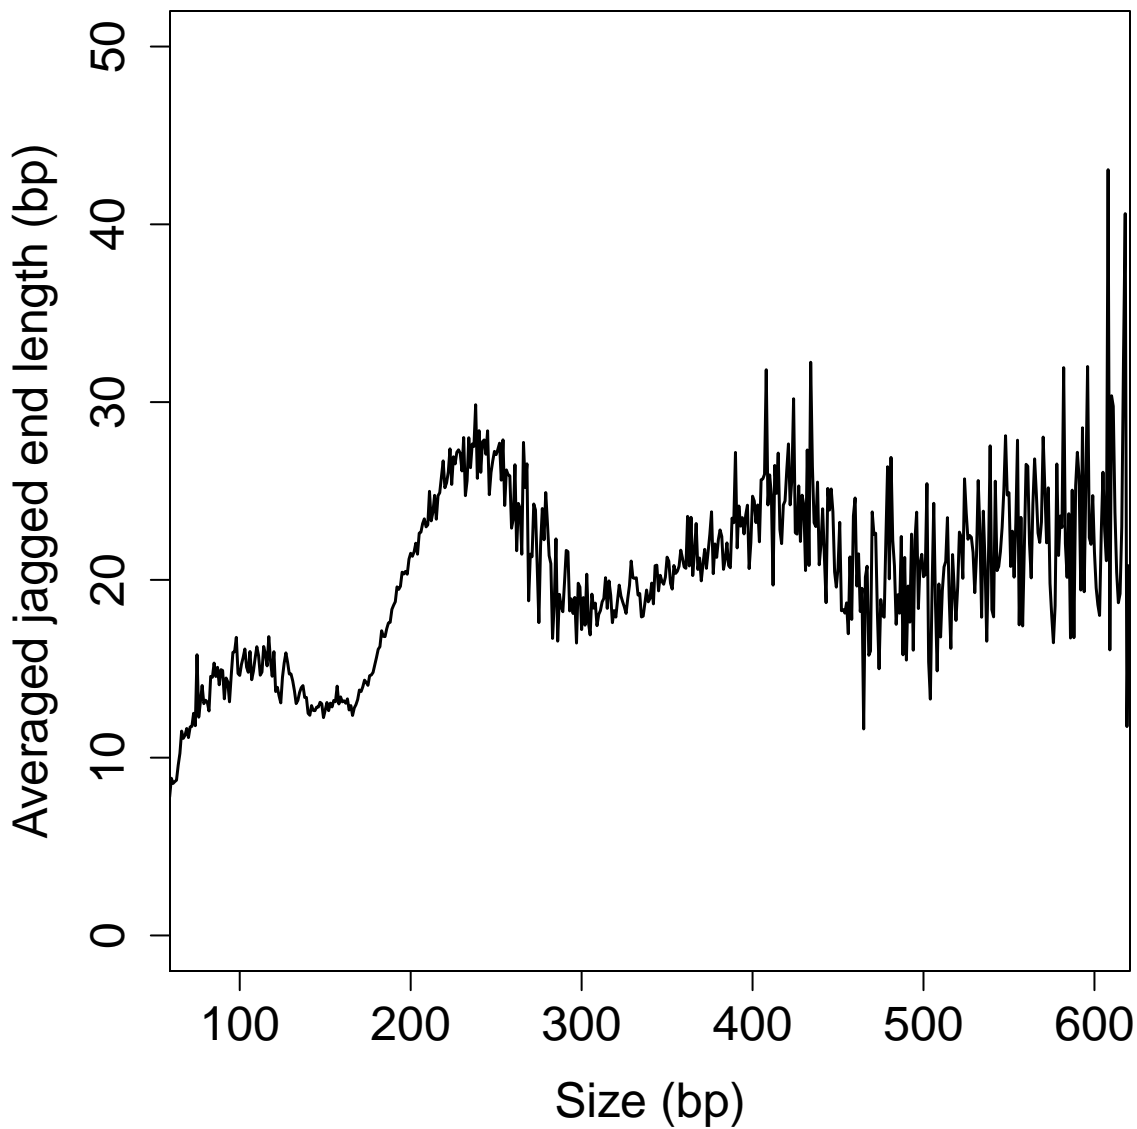

Supplement: Supplemental_Code.zip [file demo.JE.vs.size.pdf › Supplemental_Code/jagged_end_CH/demo.JE.vs.size.pdf]

demo

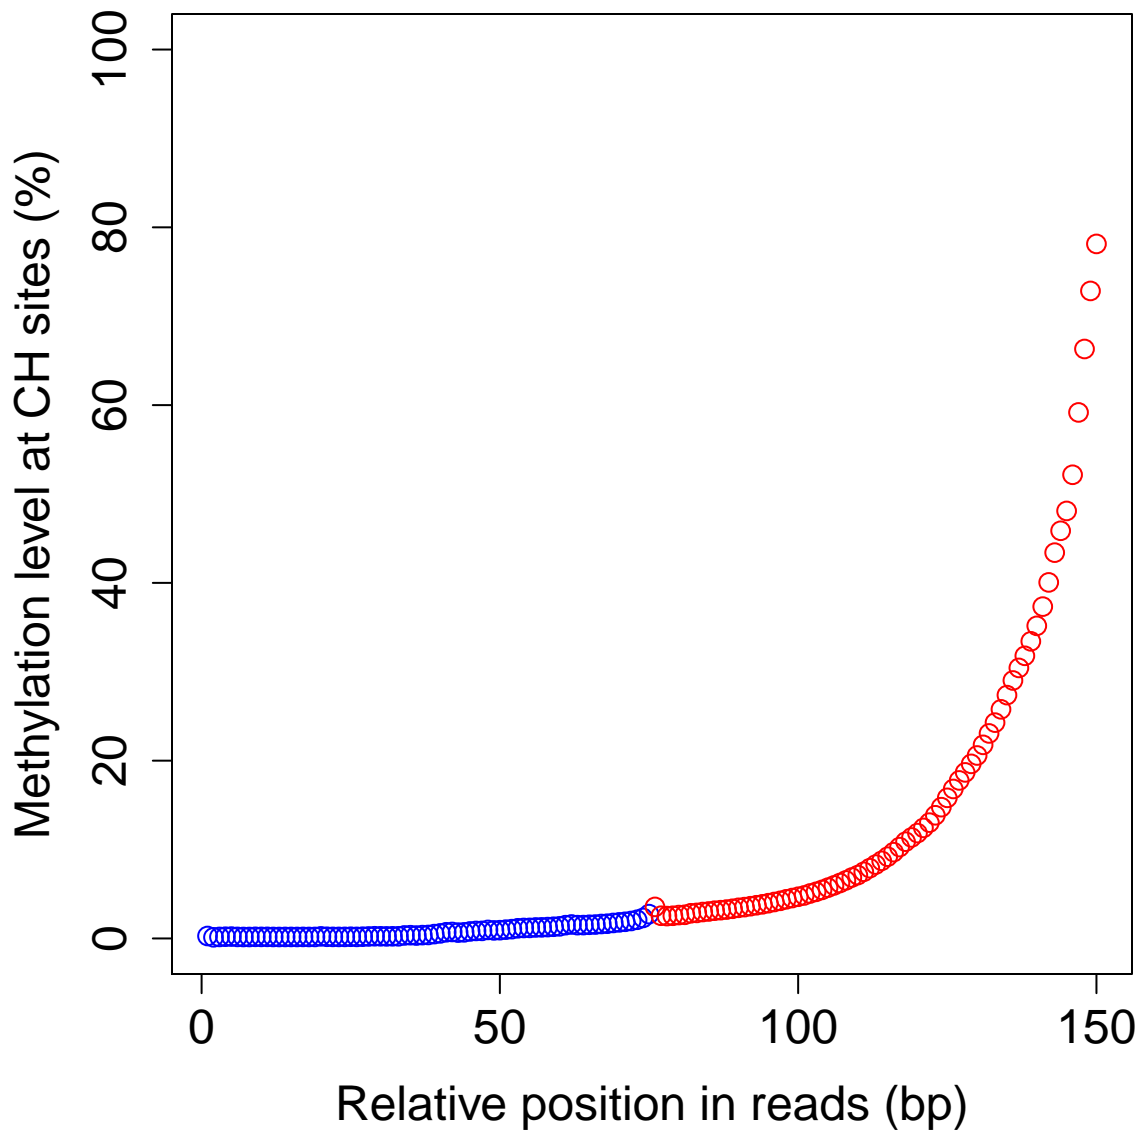

Supplement: Supplemental_Code.zip [file demo.MD.pdf › Supplemental_Code/jagged_end_CH/demo.MD.pdf]

# demo

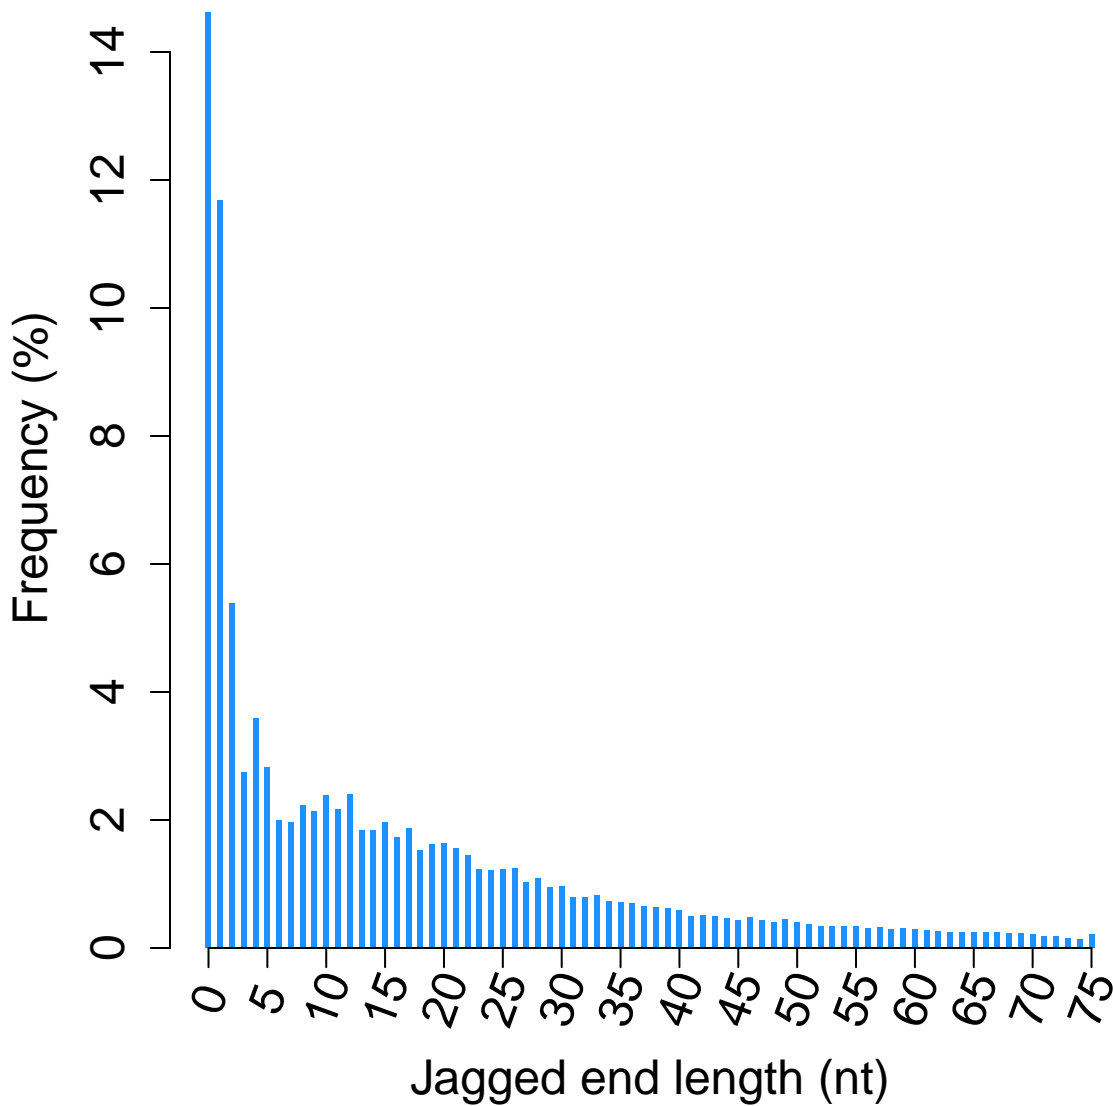

Supplement: Supplemental_Code.zip [file demo.je.bar.pdf › Supplemental_Code/jagged_end_CH/demo.je.bar.pdf]
